# Supplementary material for: Long-Term Care and Follow-Up in Laryngeal Cancer Patients: A Multicenter Retrospective Analysis
Source: MDPI journal article supplement (doi:10.3390/jpm13060927), 2023-05-31
Supplement: s1 [file s1]

**Table S1. Treatment modality for SPTs**

| Patient number | Localization                                          | Treatment modality                                                                       | Outcome |
|----------------|-------------------------------------------------------|------------------------------------------------------------------------------------------|---------|
| 1              | Oral cavity                                           | RT (60Gy)                                                                                | NED     |
| 2              | Kidney                                                | Partial nephrectomy                                                                      | NED     |
| 3              | Lung (small cell lung cancer)                         | No therapy                                                                               | DoD     |
| 4              | Colon                                                 | Hemicolectomy, chemotherapy (Mayo protocol, XELIRI protocol, FOLFIRI protocol)           | DoD     |
| 5              | Oral cavity                                           | Chemotherapy (CDDP+5-FU)                                                                 | DoD     |
| 6              | Lung                                                  | No therapy                                                                               | DoD     |
| 7              | Rectum                                                | No therapy                                                                               | NED     |
| 8              | Prostate                                              | RT (74 Gy)                                                                               | NED     |
| 9              | Larynx                                                | Total laryngectomy                                                                       | DoD     |
| 10             | Colon                                                 | Rectosigmoid resection                                                                   | NED     |
| 11             | Brain                                                 | Surgery                                                                                  | NED     |
| 12             | Oesophagus, thoracic part                             | No therapy                                                                               | DoD     |
| 13             | Oesophagus, cervical part                             | Pharyngoesophagectomy, RT (64 Gy)                                                        | DoD     |
| 14             | Bile duct                                             | No therapy                                                                               | DoD     |
| 15             | Lung                                                  | No therapy                                                                               | DoD     |
| 16             | Prostate                                              | Radical prostatectomy and pelvic lymphadenectomy, RT 68 (Gy)                             | NED     |
| 17             | Oropharynx, cervical oesophagus, neck metastases      | No therapy                                                                               | DoD     |
| 18             | Lung                                                  | Lobectomy                                                                                | DoD     |
| 19             | Lung                                                  | Chemotherapy (Cisplatin and Gemcitabine), RT (60Gy)                                      | DoD     |
| 20             | Oropharynx                                            | Surgery, RT (60 Gy)                                                                      | DoC     |
| 21             | Rectum                                                | Decision for therapy in progress                                                         | NED     |
| 22             | Pancreas                                              | No therapy                                                                               | DoD     |
| 23             | Colon                                                 | No therapy                                                                               | NED     |
| 24             | Squamous cell carcinoma of the skin, parietal region  | RT (56 Gy)                                                                               | DoC     |
| 25             | Lung                                                  | Chemotherapy (Cisplatin and Gemcitabine)                                                 | DoD     |
| 26             | Merkel cell cancer of elbow with metastases in axilla | Surgery and RT (54 Gy)                                                                   | NED     |
| 27             | Lung                                                  | RT (66 Gy)                                                                               | NED     |
| 28             | Oesophagus, cervical part                             | No therapy                                                                               | DoD     |
| 29             | Larynx, melanoma dorsi                                | RT (70 Gy) for larynx, surgical excision for melanoma                                    | NED     |
| 30             | Oropharynx, lung                                      | chemoradiotherapy (CDDP) for oropharynx, lobectomy and chemotherapy (CDDP/5-FU) for lung | NED     |

|                                                                                                               |                                   |                                                                                                                   |     |
|---------------------------------------------------------------------------------------------------------------|-----------------------------------|-------------------------------------------------------------------------------------------------------------------|-----|
| 31                                                                                                            | Lung                              | RT (60 Gy)                                                                                                        | DoD |
| 32                                                                                                            | Oesophagus, thoracic part         | No therapy                                                                                                        | DoD |
| 33                                                                                                            | Oesophagus, cervical part         | No therapy                                                                                                        | DoD |
| 34                                                                                                            | Pleural mesothelioma              | Chemotherapy (CCDP)                                                                                               | DoD |
| 35                                                                                                            | Lung                              | Chemotherapy (Carboplatinum and Pemetreksed)                                                                      | DoD |
| 36                                                                                                            | Rectum                            | Resection of rectum                                                                                               | DoD |
| 37                                                                                                            | Prostate                          | TURP                                                                                                              | NED |
| 38                                                                                                            | Larynx                            | Total laryngectomy                                                                                                | DoC |
| 39                                                                                                            | Prostate                          | Radical prostatectomy and pelvic lymphadenectomy                                                                  | NED |
| 40                                                                                                            | Oropharynx                        | Partial pharyngectomy, RT (60 Gy)                                                                                 | NED |
| 41                                                                                                            | Melanoma dorsi                    | Surgical excision                                                                                                 | NED |
| 42                                                                                                            | Prostate, neopharynx, lung        | Radical prostatectomy and Eligard, partial pharyngectomy and RT (30 Gy) for oropharynx, RT (30Gy) for lung cancer | DoD |
| 43                                                                                                            | Urinary bladder                   | Radical cistectomy                                                                                                | NED |
| 44                                                                                                            | Non-Hodgkin lymphoma              | Chemotherapy (CHOP protocol) + methotrexate                                                                       | DoC |
| 45                                                                                                            | Urinary bladder, lung             | TUR, chemotherapy (Gemcitabine + carboplatinum)                                                                   | DoD |
| 46                                                                                                            | Lung                              | Lobectomy                                                                                                         | DoD |
| 47                                                                                                            | Prostate with metastases in bones | Eligard + Docetaxelum                                                                                             | NED |
| 48                                                                                                            | Stomach                           | Gastrectomia distalis cum anastomosis gastrojejunalis                                                             | NED |
| 49                                                                                                            | Pancreas                          | No therapy                                                                                                        | DoD |
| 50                                                                                                            | Urinary bladder                   | TUR                                                                                                               | DoC |
| 51                                                                                                            | Acute myloid leucemia             | Polychemotherapy                                                                                                  | NED |
| 52                                                                                                            | Non-Hodgkin lymphoma              | Polychemotherapy                                                                                                  | DoD |
| 53                                                                                                            | Breast                            | Mastectomy                                                                                                        | NED |
| 54                                                                                                            | Larynx                            | Total laryngectomy                                                                                                | DoD |
| 55                                                                                                            | Pancreas                          | Whipple operation + chemotherapy (Gemcitabine)                                                                    | NED |
| 56                                                                                                            | Cecum                             | Chemotherapy (RP protocol)                                                                                        | NED |
| 57                                                                                                            | Rectum                            | Resection of rectum, RT (60 Gy)                                                                                   | DoD |
| 58                                                                                                            | Lung                              | Chemotherapy (Carboplatinum + Gemcitabine)                                                                        | DoD |
| 59                                                                                                            | Lung                              | Palliative RT (20 Gy)                                                                                             | DoD |
| 60                                                                                                            | Thyroid gland                     | Total thyroidectomy                                                                                               | NED |
| Abbreviations: RT= radiotherapy; NED= no evidence of disease; DoD= died of disease; DoC= died of other causes |                                   |                                                                                                                   |     |
| Data is available for 60 (65,9%) of the 91 patients                                                           |                                   |                                                                                                                   |     |

**Table S2. Treatment modality for tumor recurrence**

| Patient number                                                                     | Localization       | Treatment modality                                                  | Outcome |
|------------------------------------------------------------------------------------|--------------------|---------------------------------------------------------------------|---------|
| 1                                                                                  | Neck               | Neck dissection                                                     | NED     |
| 2                                                                                  | Larynx             | Total laryngectomy, thyroid lobectomy, neck dissection              | NED     |
| 3                                                                                  | Trachea            | No therapy                                                          | DoD     |
| 4                                                                                  | Lung               | Chemotherapy (CDDP/5FU)                                             | DoD     |
| 5                                                                                  | Tracheostoma, neck | Neck dissection, palliative RT (30-45 Gy)                           | DoD     |
| 6                                                                                  | Tracheostoma       | Palliative RT (30-45 Gy)                                            | DoD     |
| 7                                                                                  | Neck               | Neck dissection, palliative RT (30-45 Gy)                           | DoD     |
| 8                                                                                  | Lung               | Palliative RT (30-45 Gy)                                            | DoD     |
| 9                                                                                  | Lung               | No therapy                                                          | DoD     |
| 10                                                                                 | Skin infiltration  | Surgery, Cetuximab                                                  | DoD     |
| 11                                                                                 | Lung               | Palliative RT (30-45 Gy)                                            | DoD     |
| 12                                                                                 | Neck, lung         | Neck dissection, chemotherapy (CDDP/5FU)                            | NED     |
| 13                                                                                 | Esophagus          | Palliative RT (30-45 Gy)                                            | DoD     |
| 14                                                                                 | Esophagus          | No therapy                                                          | DoD     |
| 15                                                                                 | Neck               | Neck dissection                                                     | NED     |
| 16                                                                                 | Larynx             | Laryngectomy partialis                                              | NED     |
| 17                                                                                 | Lung               | Palliative RT (30-45 Gy)                                            | DoD     |
| 18                                                                                 | Larynx             | RT (70 Gy), Cetuximab                                               | NED     |
| 19                                                                                 | Larynx             | Laryngectomy partialis                                              | NED     |
| 20                                                                                 | Pharynx            | Total pharyngectomy, neck dissection, Cetuximab                     | DoD     |
| 21                                                                                 | Neck               | Chemotherapy (CDDP/5FU), Cetuximab                                  | DoD     |
| 22                                                                                 | Neck               | Chemotherapy (CDDP/5-FU), neck dissection, palliative RT (30-45 Gy) | DoD     |
| 23                                                                                 | Tracheostoma       | Surgery, RT (60 Gy)                                                 | DoD     |
| 24                                                                                 | Tracheostoma       | No therapy                                                          | DoD     |
| 25                                                                                 | Tracheostoma       | No therapy                                                          | DoD     |
| 26                                                                                 | Neck               | Chemotherapy (CDDP/5FU), RT (50 Gy)                                 | DoD     |
| 27                                                                                 | Oral cavity        | Commando procedure                                                  | DoD     |
| Abbreviations: RT= radiotherapy; NED= no evidence of disease; DoD= died of disease |                    |                                                                     |         |
| Data is available for 27 (41,5%) of the 65 patients                                |                    |                                                                     |         |
